# Supplementary material
Source: publisher site journal article supplement (https://www.kjim.org/upload/media/kjim-2023-350-Supplementary-Table-2.pdf)
Supplement: Supplementary file 1 [file kjim-2023-350-Supplementary-Table-2.pdf]

**Supplementary Table 2. Fatigue improvement based on FACIT-Fatigue scale or fatigue VAS**

| Variable                | FACIT-Fatigue | Fatigue VAS |
|-------------------------|---------------|-------------|
| KRG (n = 56)            |               |             |
| Week 0                  | 31.1 ± 8.3    | 67.6 ± 14.8 |
| Week 12                 | 35.7 ± 8.7    | 51.4 ± 21.4 |
| p value                 | 0.001         | < 0.001     |
| Placebo (n = 56)        |               |             |
| Week 0                  | 32.4 ± 8.1    | 62.9 ± 15.3 |
| Week 12                 | 36.4 ± 6.9    | 50.6 ± 21.1 |
| p value                 | < 0.001       | < 0.001     |
| Continuous-KRG (n = 55) |               |             |
| Week 0                  | 31.1 ± 8.3    | 67.5 ± 15.1 |
| Week 24                 | 36.7 ± 8.4    | 51.1 ± 22.6 |
| p value                 | < 0.001       | < 0.001     |
| Placebo-KRG (n = 54)    |               |             |
| Week 0                  | 32.6 ± 8.1    | 62.2 ± 15.3 |
| Week 24                 | 38.2 ± 6.8    | 47.6 ± 22.1 |
| p value                 | < 0.001       | < 0.001     |

Values are presented as mean ± standard deviation.

FACIT-Fatigue, The Functional Assessment of Chronic Illness Therapy-Fatigue; VAS, visual analog scale; KRG, Korean Red Ginseng.
